# Supplementary material for: Antioxidative Responses to Pre-Storage Hot Water Treatment of Red Sweet Pepper (Capsicum annuum L.) Fruit during Cold Storage
Source: MDPI journal article supplement (doi:10.3390/foods10123031), 2021-12-06
Supplement: s1 [file s1]

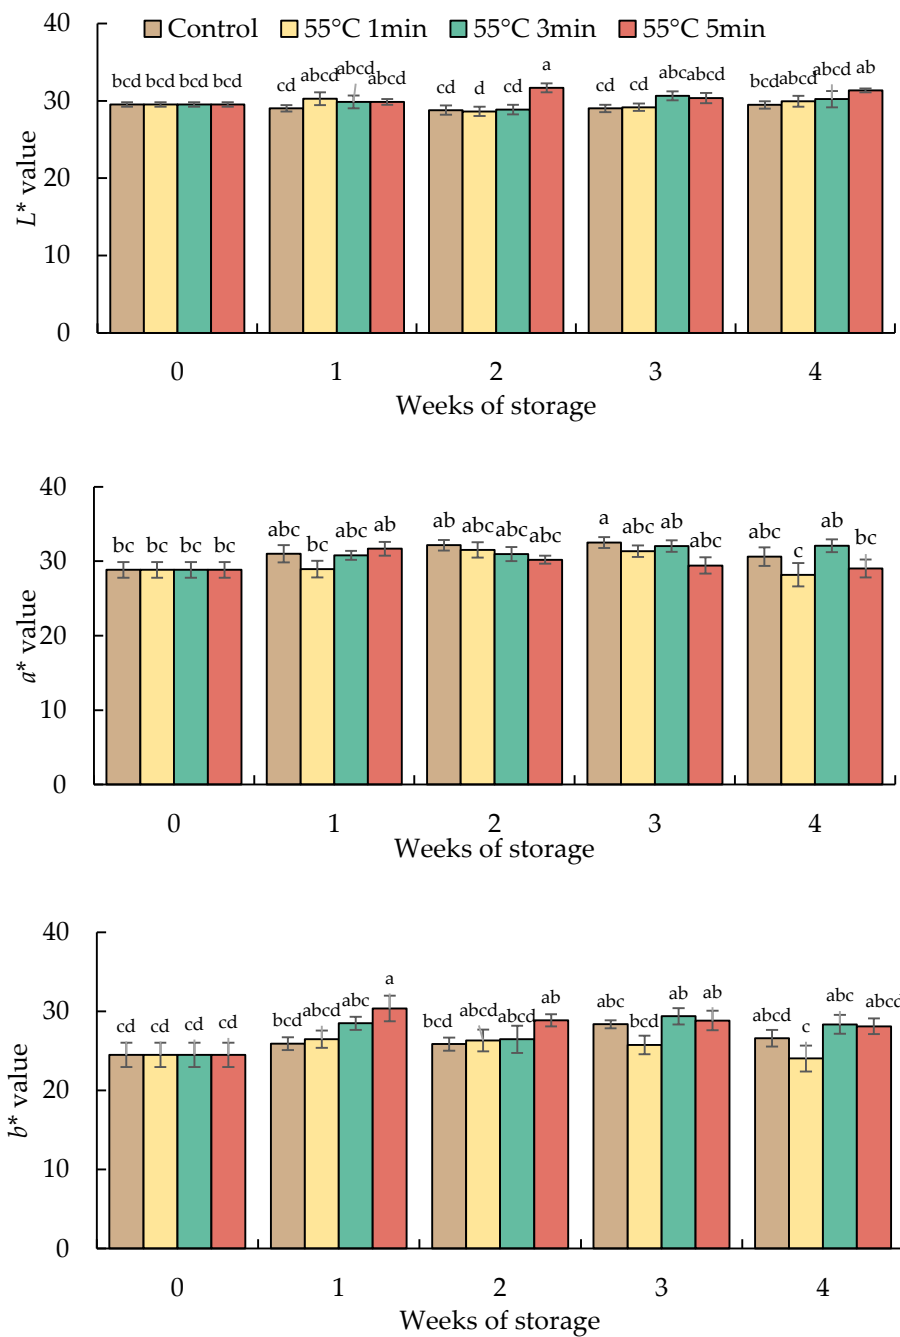

**Figure S1.** Effect of hot water treatment (55 °C for 1, 3, 5 min) on  $L^*$ ,  $a^*$ ,  $b^*$  color in red sweet pepper fruit during storage at 10 °C. Data represent means  $\pm$  S.E. (n = 3). Different letters on bars are significantly different ( $P < 0.05$ ).
